# Supplementary material for: Routine monitoring of western Lake Erie to track water quality changes associated with cyanobacterial harmful algal blooms
Source: Copernicus journal article supplement (doi:10.5194/essd-15-3853-2023), 2023-08-25
Supplement: Supplementary file 1 [file essd-15-3853-2023-supplement.pdf]

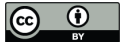

*Supplement of*

## **Routine monitoring of western Lake Erie to track water quality changes associated with cyanobacterial harmful algal blooms**

**Anna G. Boegehold et al.**

*Correspondence to:* Anna G. Boegehold ([annaboeg@umich.edu](mailto:annaboeg@umich.edu)) and Reagan Errera ([reagan.errera@noaa.gov](mailto:reagan.errera@noaa.gov))

The copyright of individual parts of the supplement might differ from the article licence.

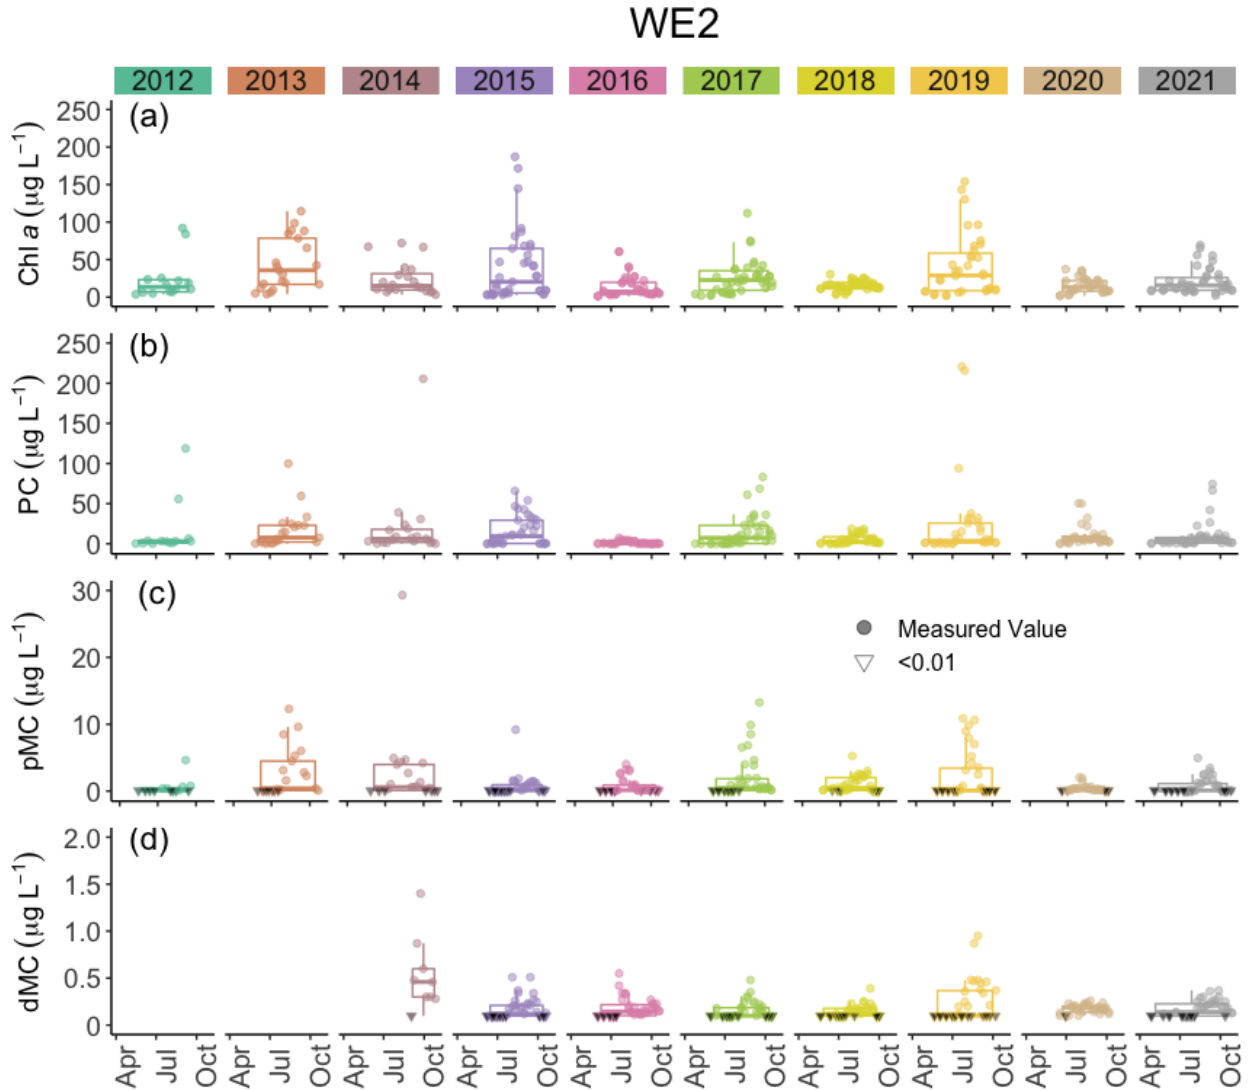

Figure S1. Concentrations of chlorophyll a (Chl a), phycocyanin (PC), particulate microcystins (pMC), and dissolved microcystins (dMC) at Station WE02 for all years sampled. Boxplots represent the median and 25% and 75% quartiles with whiskers extending to the highest or lowest point within 1.5x the interquartile range. A scatterplot is overlaid on the boxplots.

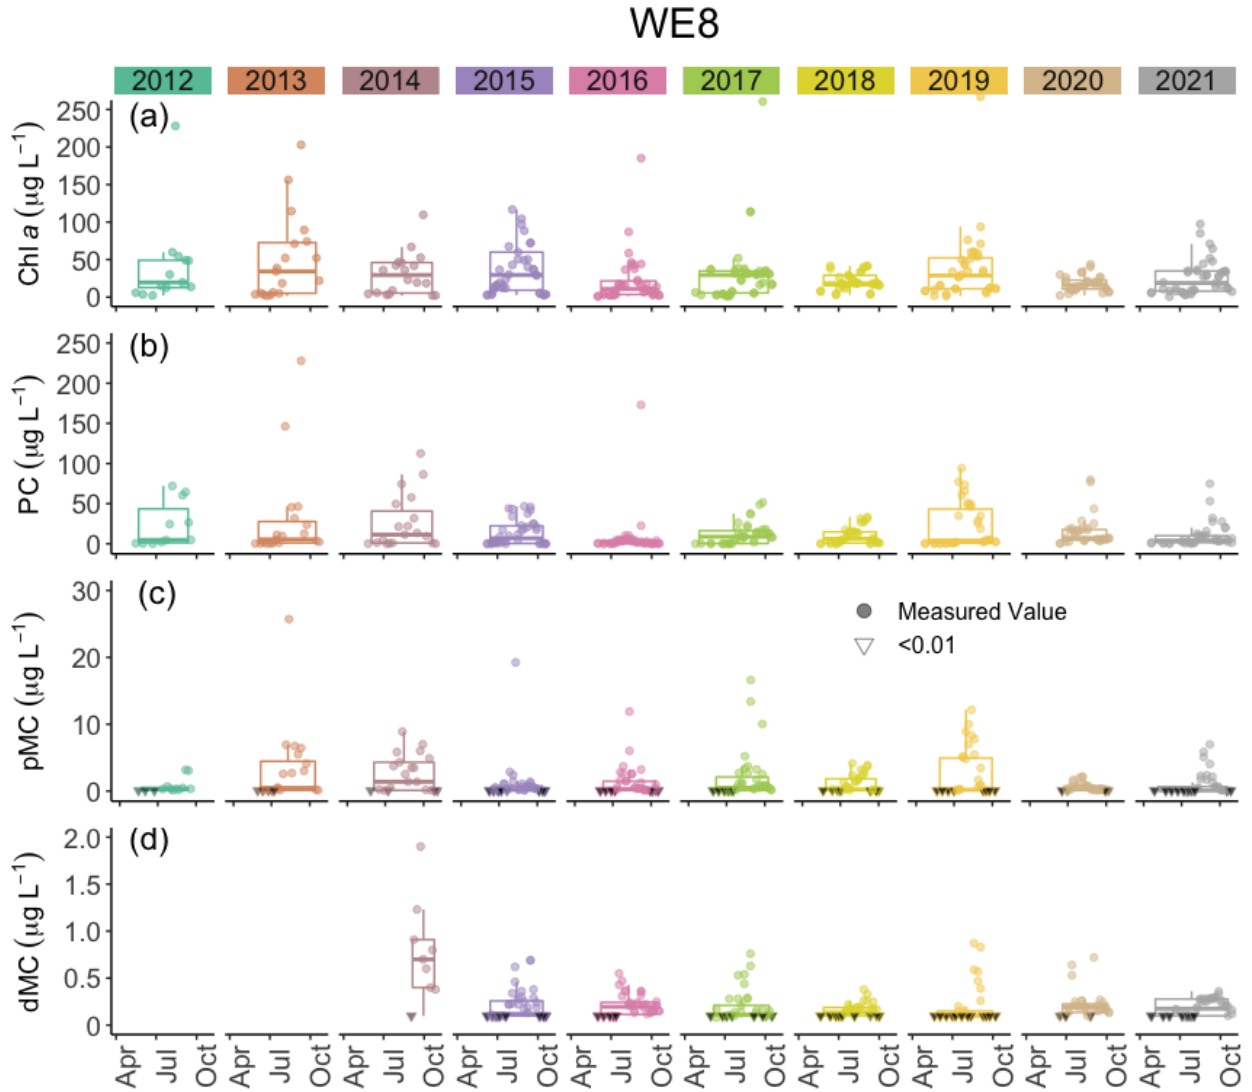

Figure S2. Concentrations of chlorophyll a (Chl a), phycocyanin (PC), particulate microcystins (pMC), and dissolved microcystins (dMC) at Station WE08 for all years sampled. Boxplots represent the median and 25% and 75% quartiles with whiskers extending to the highest or lowest point within 1.5x the interquartile range. A scatterplot is overlaid on the boxplots.

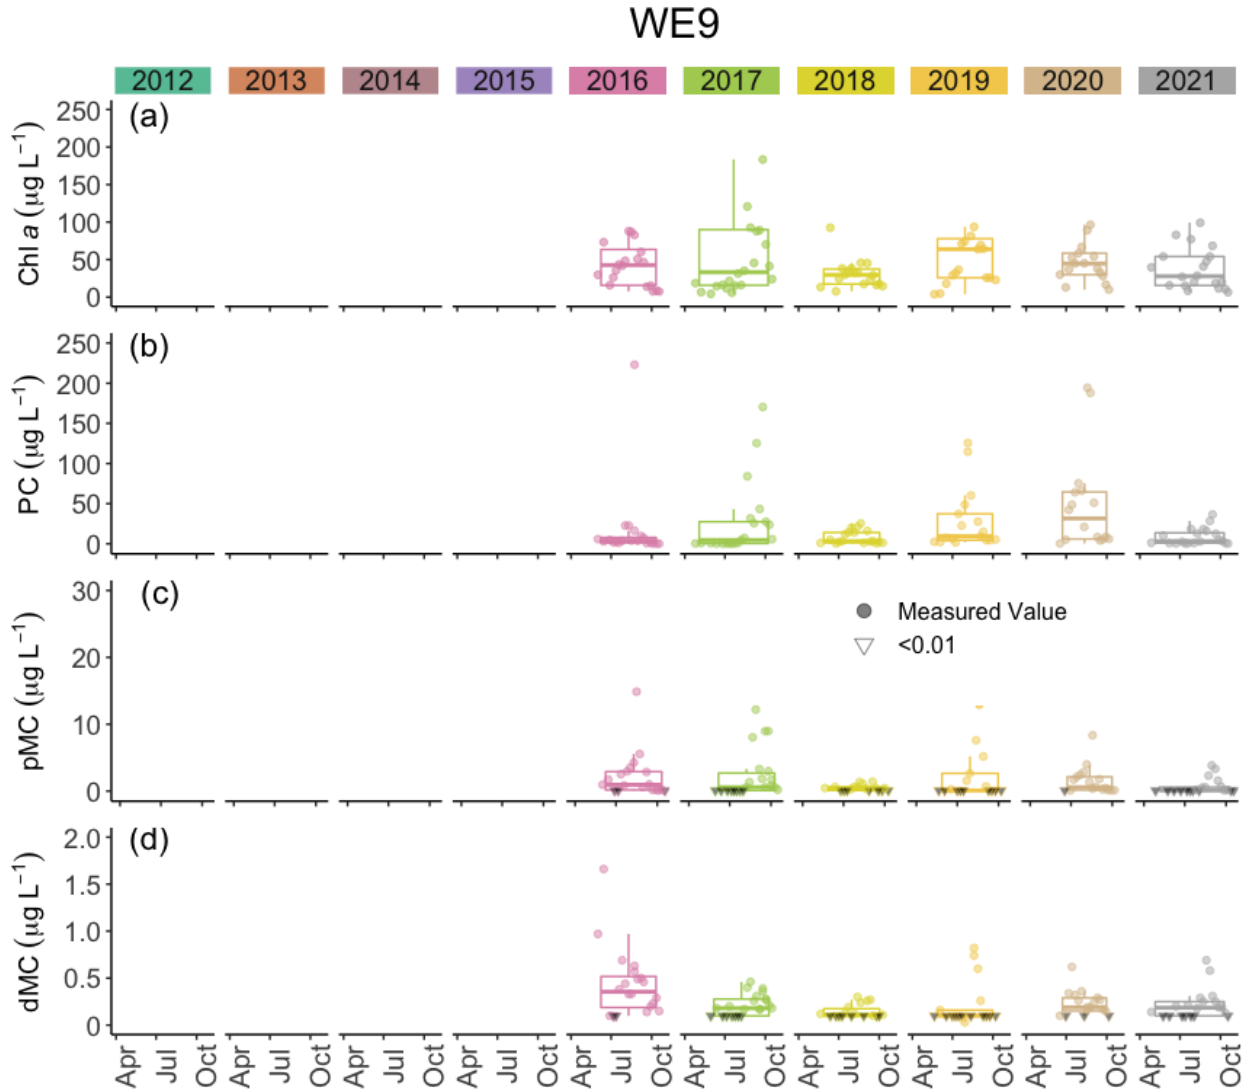

Figure S3. Concentrations of chlorophyll a (Chl a), phycocyanin (PC), particulate microcystins (pMC), and dissolved microcystins (dMC) at Station WE09 for all years sampled. Boxplots represent the median and 25% and 75% quartiles with whiskers extending to the highest or lowest point within 1.5x the interquartile range. A scatterplot is overlaid on the boxplots.

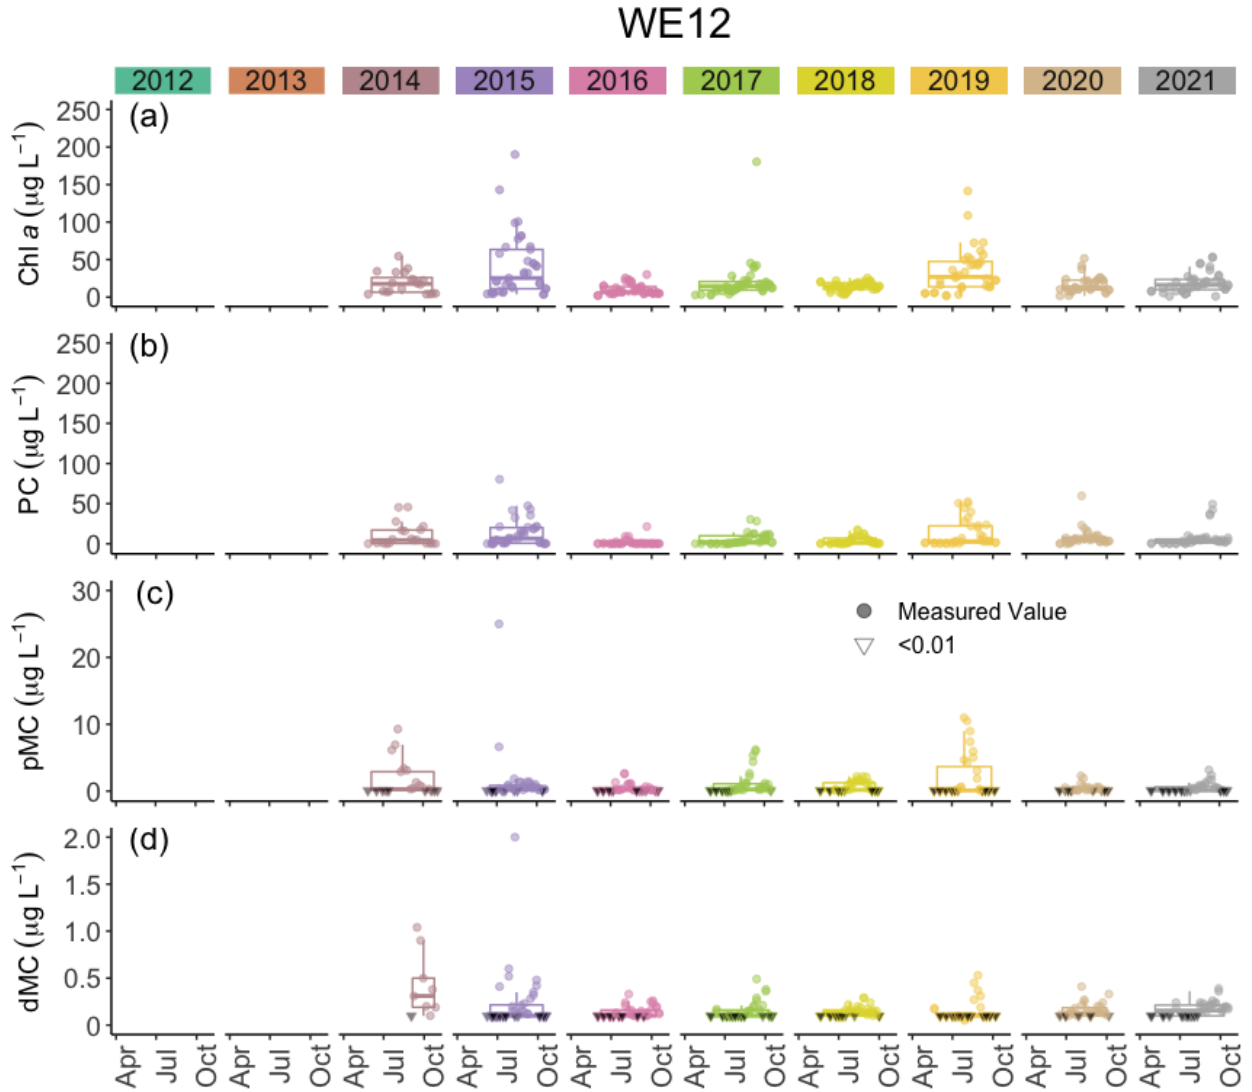

Figure S4. Concentrations of chlorophyll *a* (Chl *a*), phycocyanin (PC), particulate microcystins (pMC), and dissolved microcystins (dMC) at Station WE12 for all years sampled. Boxplots represent the median and 25% and 75% quartiles with whiskers extending to the highest or lowest point within 1.5x the interquartile range. A scatterplot is overlaid on the boxplots.

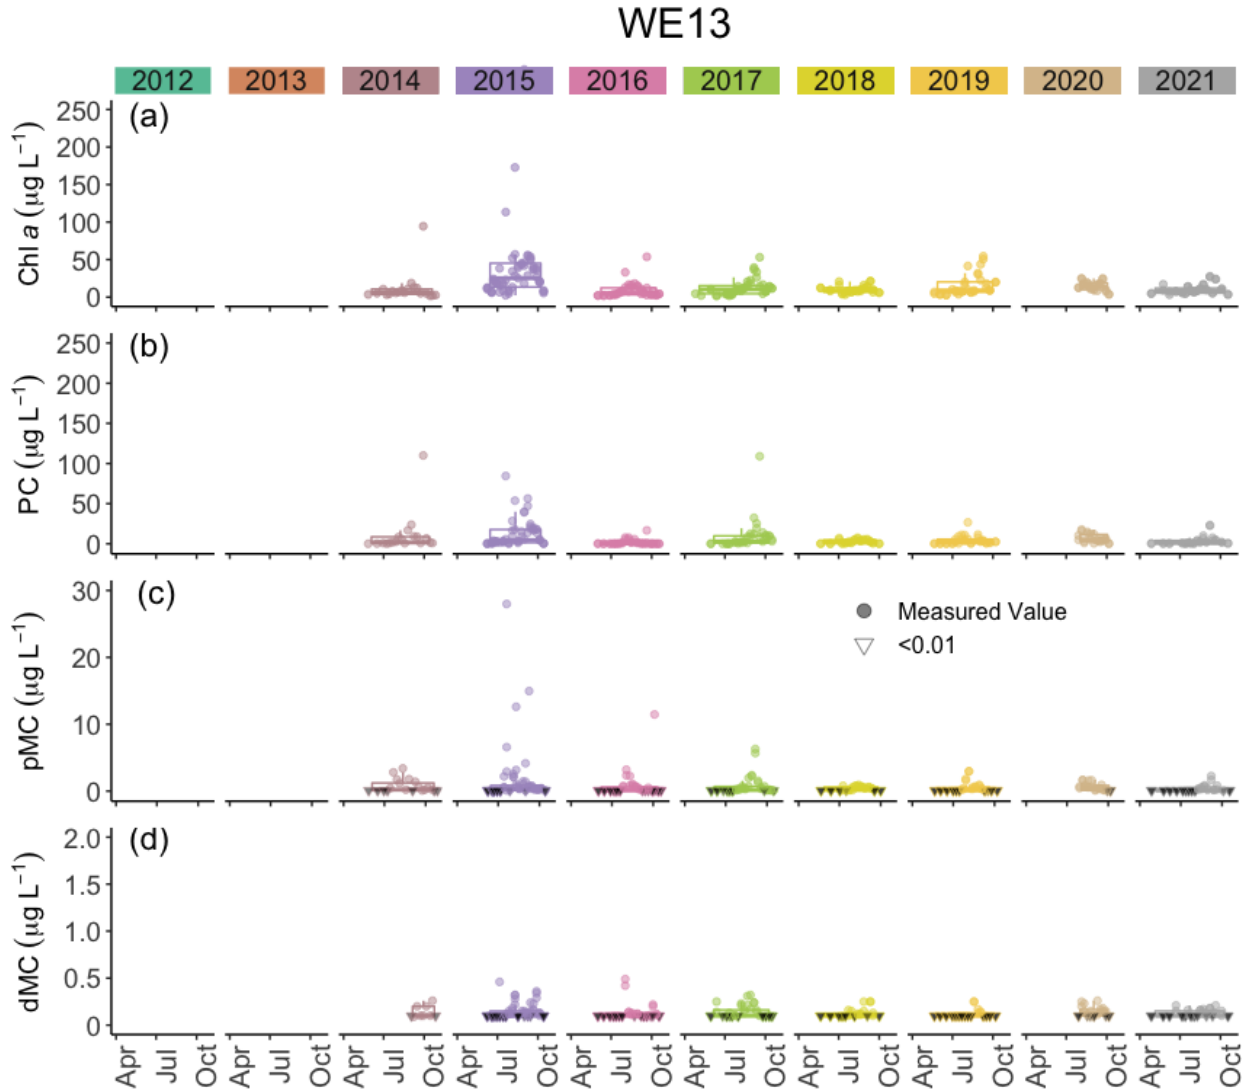

Figure S5. Concentrations of chlorophyll a (Chl a), phycocyanin (PC), particulate microcystins (pMC), and dissolved microcystins (dMC) at Station WE13 for all years sampled. Boxplots represent the median and 25% and 75% quartiles with whiskers extending to the highest or lowest point within 1.5x the interquartile range. A scatterplot is overlaid on the boxplots.

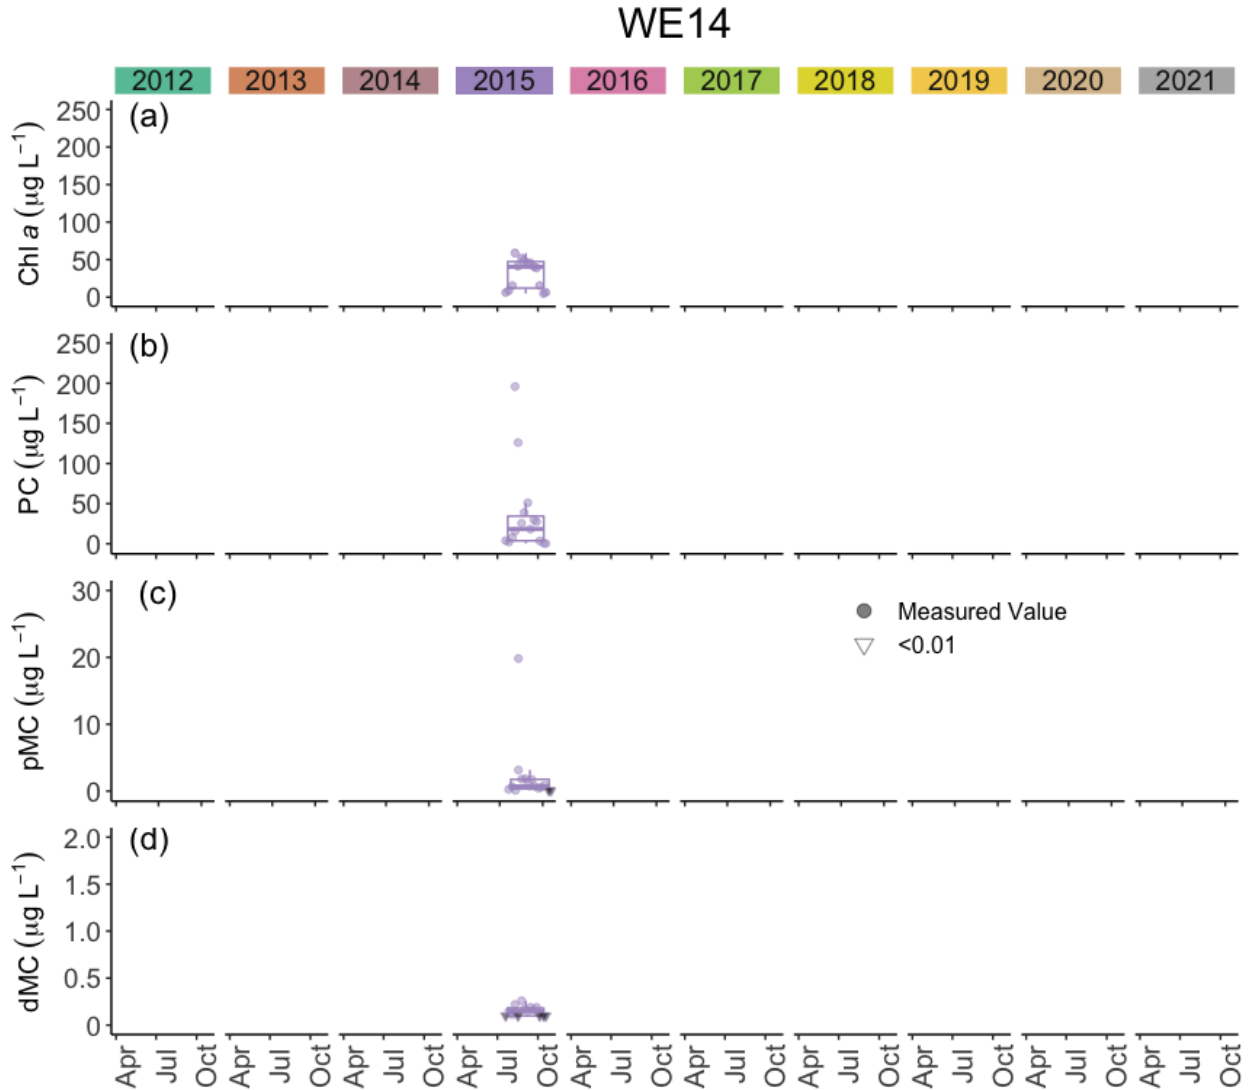

Figure S6. Concentrations of chlorophyll a (Chl a), phycocyanin (PC), particulate microcystins (pMC), and dissolved microcystins (dMC) at Station WE14 for all years sampled. Boxplots represent the median and 25% and 75% quartiles with whiskers extending to the highest or lowest point within 1.5x the interquartile range. A scatterplot is overlaid on the boxplots.

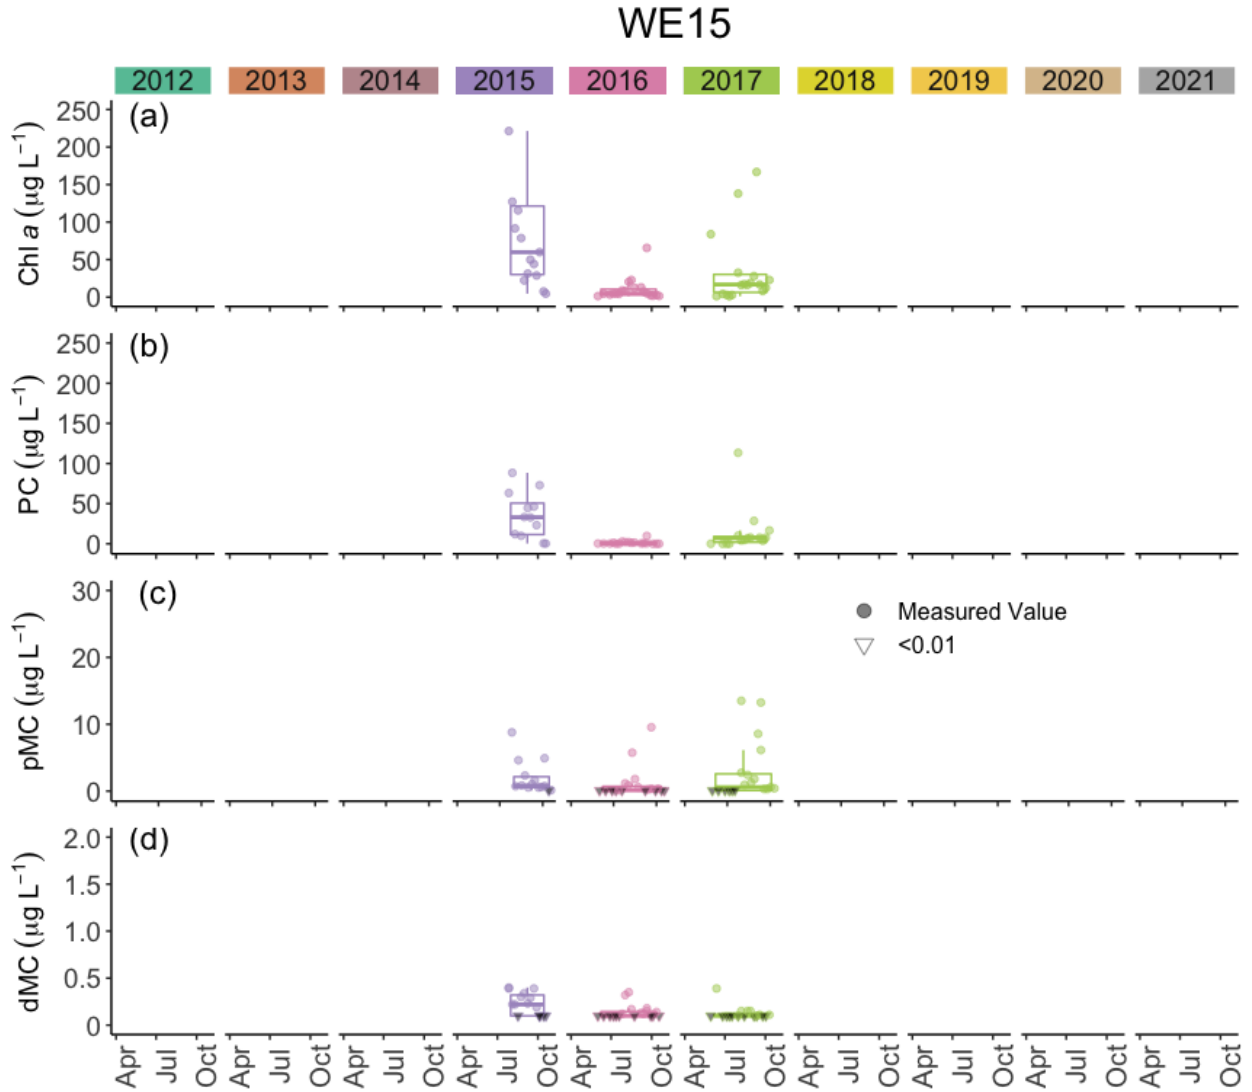

Figure S7. Concentrations of chlorophyll a (Chl a), phycocyanin (PC), particulate microcystins (pMC), and dissolved microcystins (dMC) at Station WE15 for all years sampled. Boxplots represent the median and 25% and 75% quartiles with whiskers extending to the highest or lowest point within 1.5x the interquartile range. A scatterplot is overlaid on the boxplots.



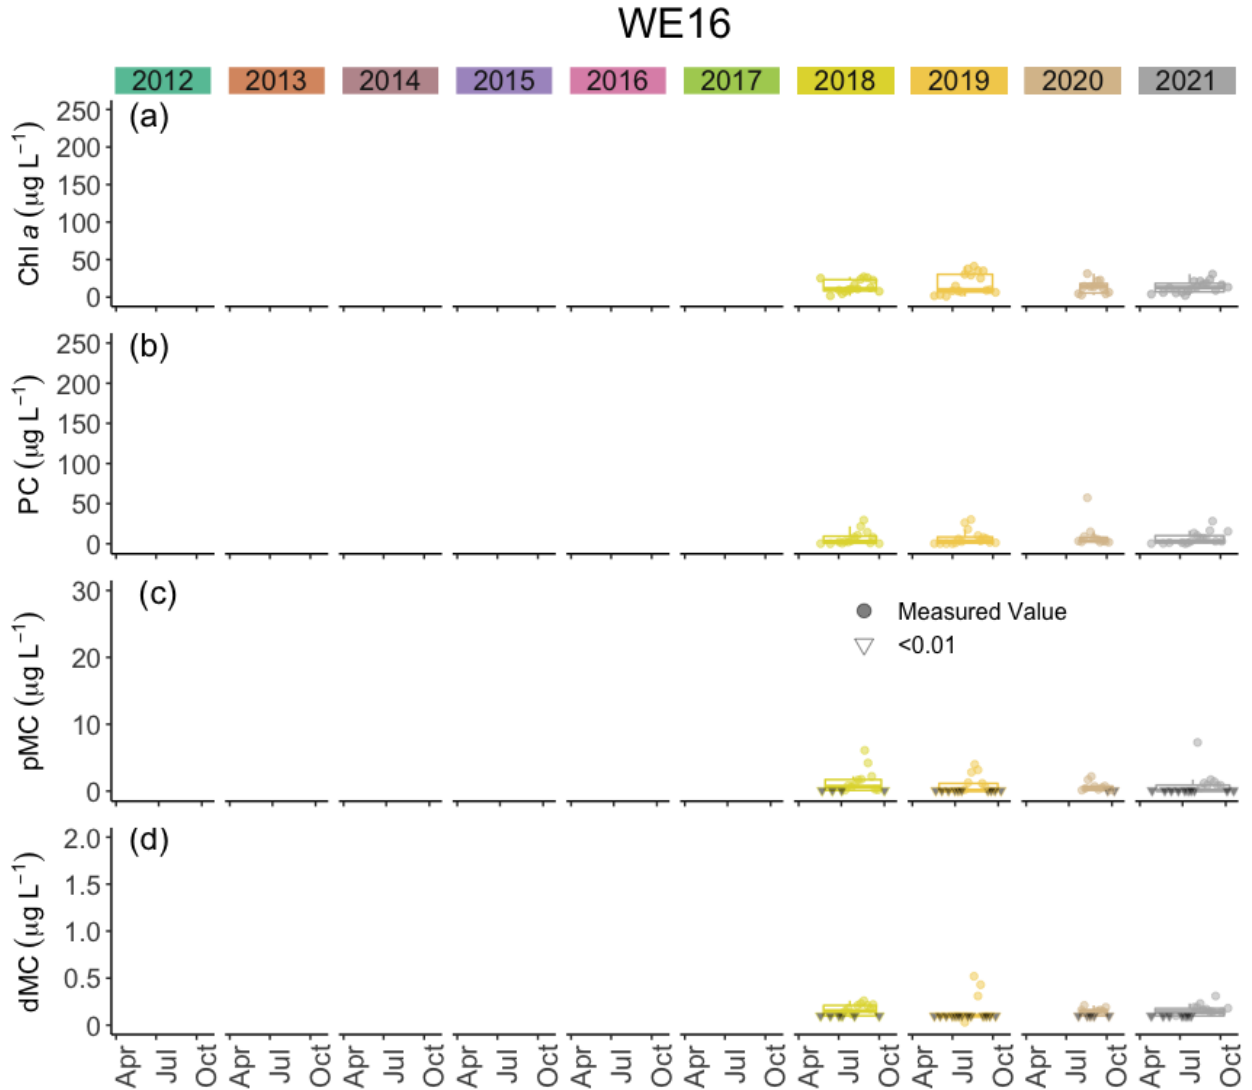

Figure S8. Concentrations of chlorophyll a (Chl a), phycocyanin (PC), particulate microcystins (pMC), and dissolved microcystins (dMC) at Station WE16 for all years sampled. Boxplots represent the median and 25% and 75% quartiles with whiskers extending to the highest or lowest point within 1.5x the interquartile range. A scatterplot is overlaid on the boxplots.

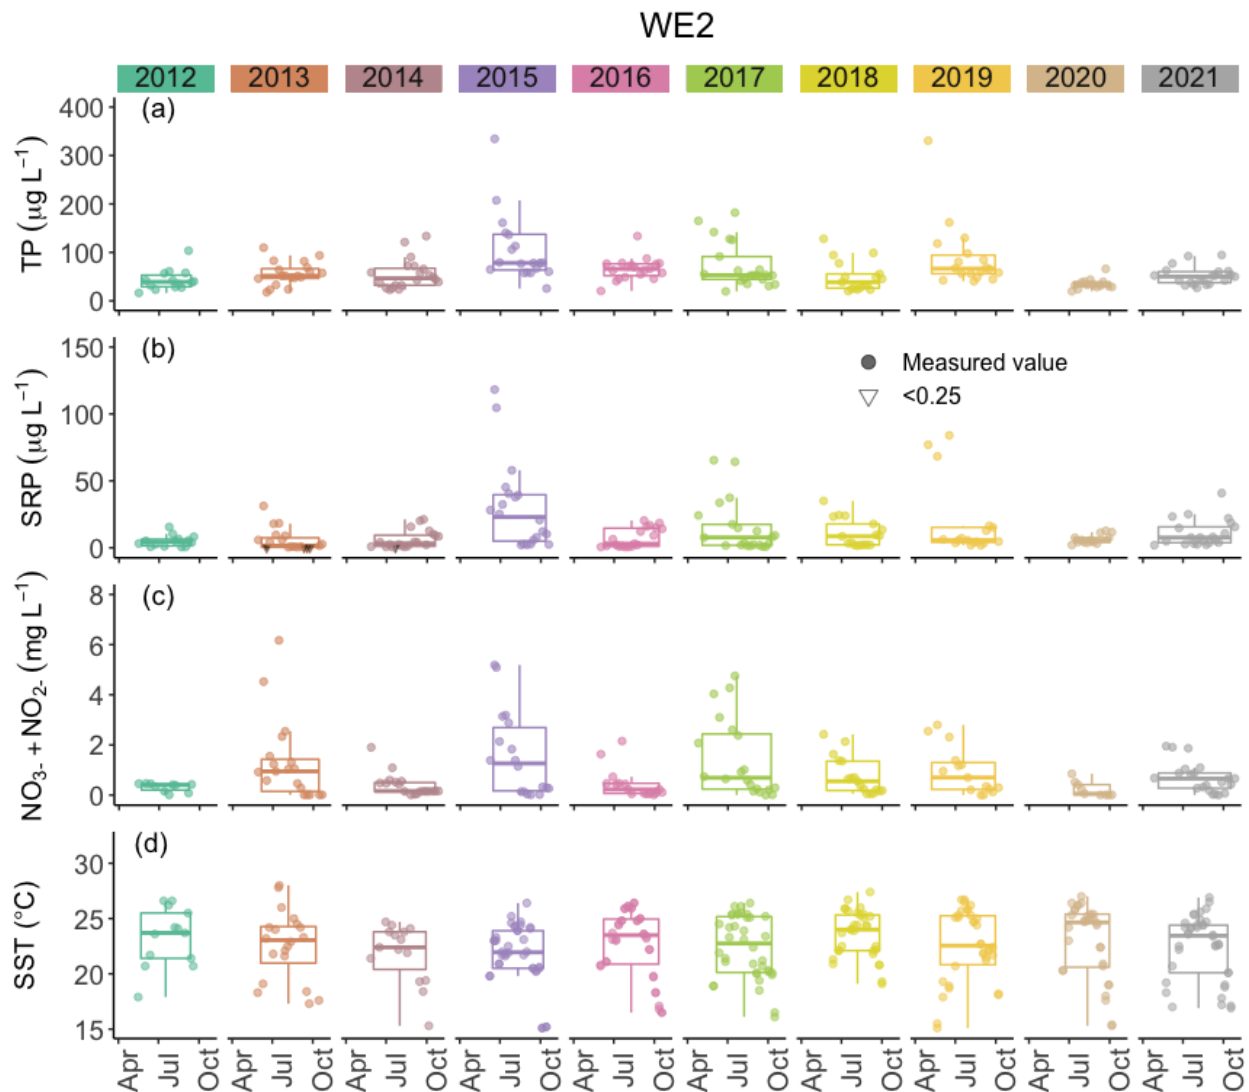

Figure S9. Concentrations of total phosphorus (TP), soluble reactive phosphorus (SRP), nitrate plus nitrite ( $\text{NO}_3^- + \text{NO}_2^-$ ), and sea surface temperature (SST) at Station WE02 for all years sampled. Boxplots represent the median and 25% and 75% quartiles with whiskers extending to the highest or lowest point within 1.5x the interquartile range. A scatterplot is overlaid on the boxplots.

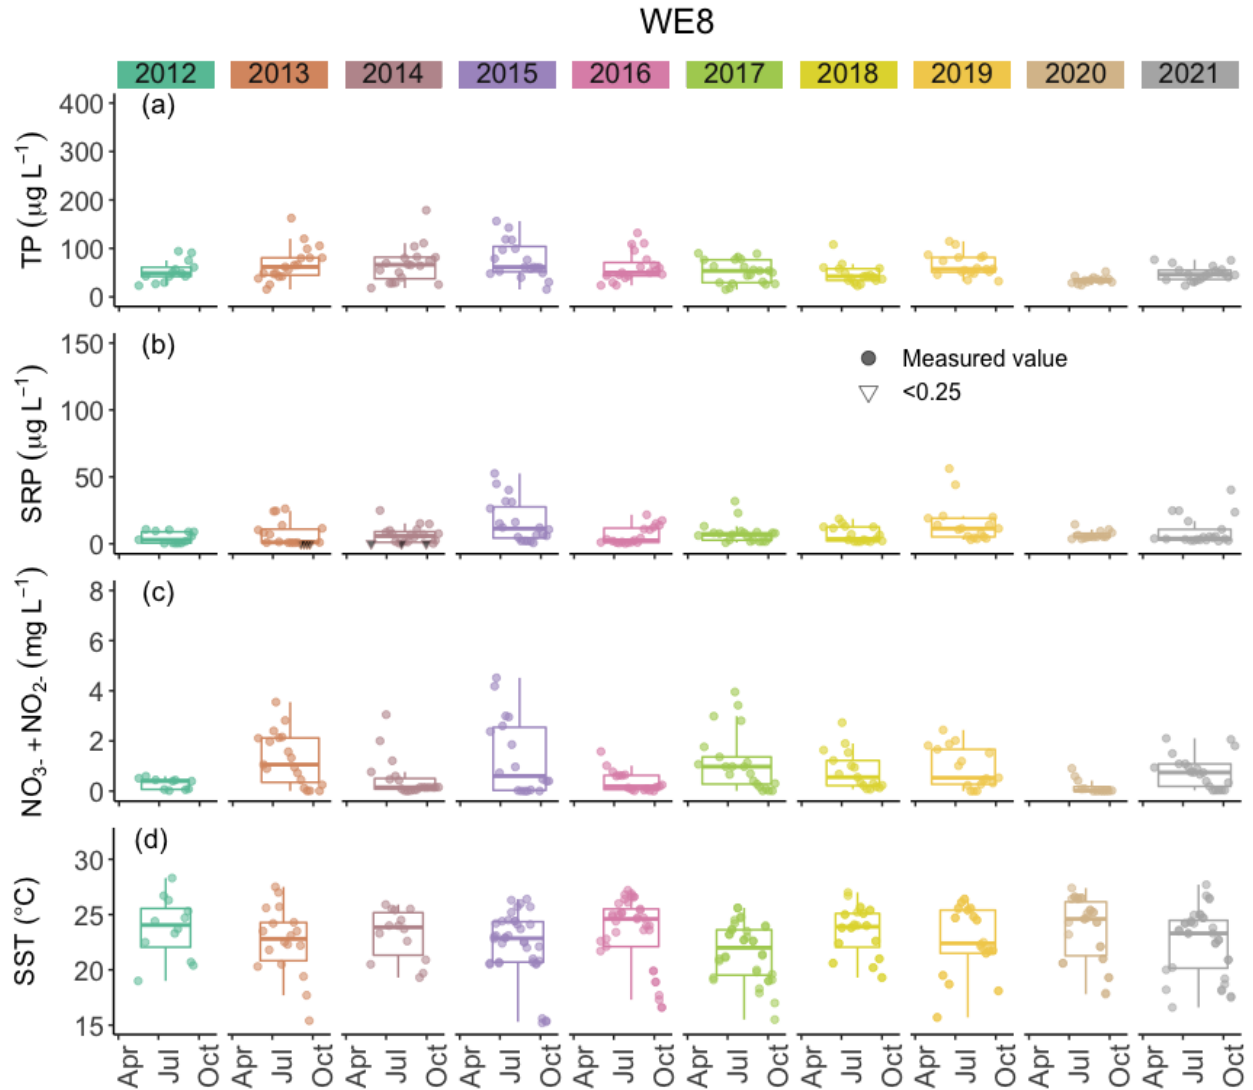

Figure S10. Concentrations of total phosphorus (TP), soluble reactive phosphorus (SRP), nitrate plus nitrite ( $\text{NO}_3^- + \text{NO}_2^-$ ), and sea surface temperature (SST) at Station WE08 for all years sampled. Boxplots represent the median and 25% and 75% quartiles with whiskers extending to the highest or lowest point within 1.5x the interquartile range. A scatterplot is overlaid on the boxplots.

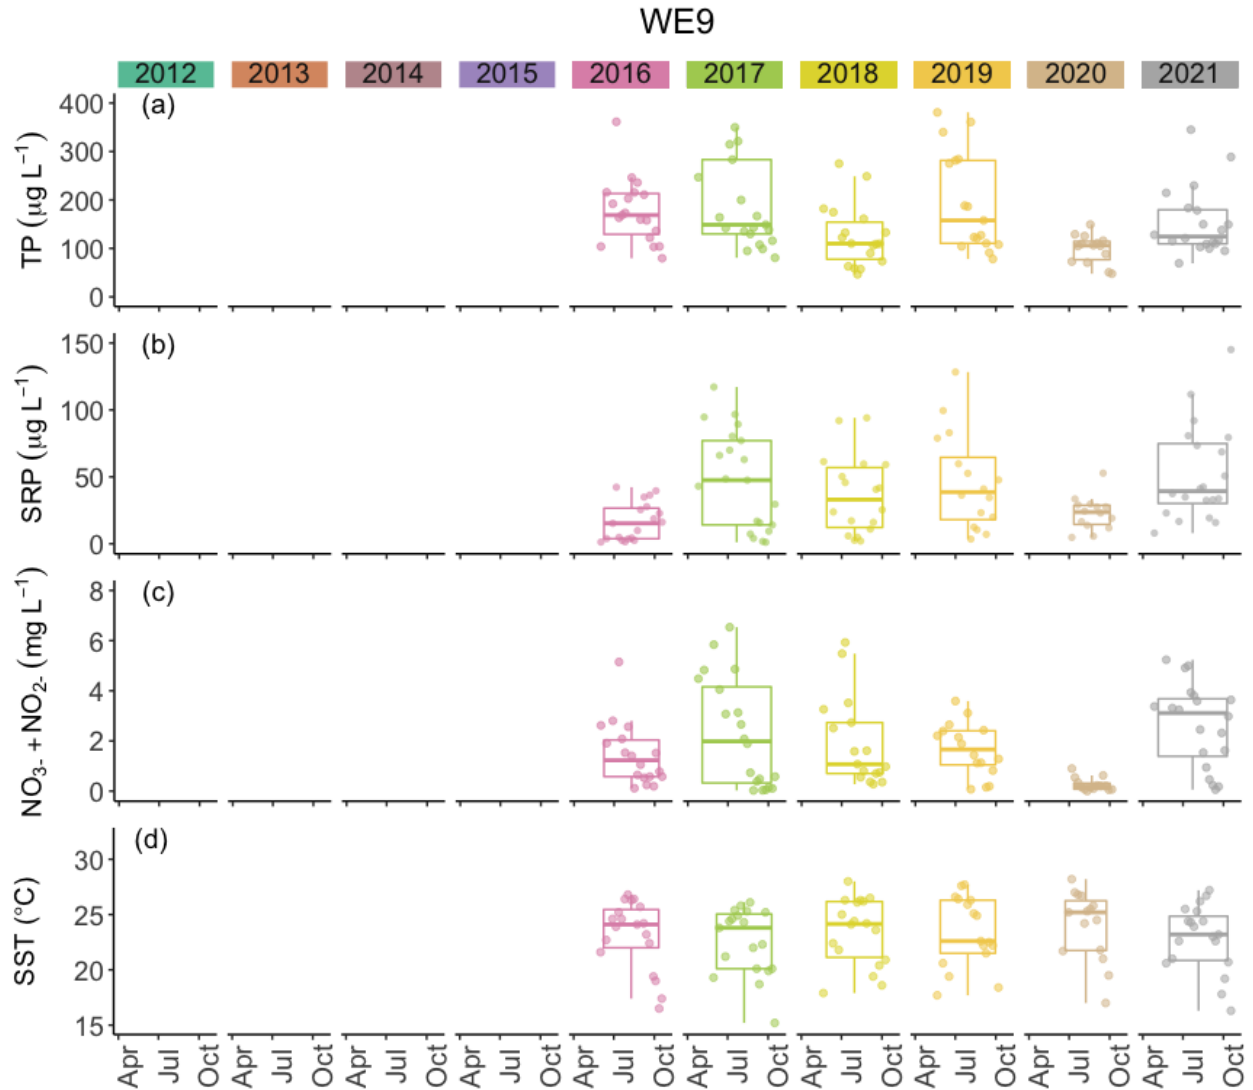

Figure S11. Concentrations of total phosphorus (TP), soluble reactive phosphorus (SRP), nitrate plus nitrite ( $\text{NO}_3^- + \text{NO}_2^-$ ), and sea surface temperature (SST) at Station WE09 for all years sampled. Boxplots represent the median and 25% and 75% quartiles with whiskers extending to the highest or lowest point within 1.5x the interquartile range. A scatterplot is overlaid on the boxplots.

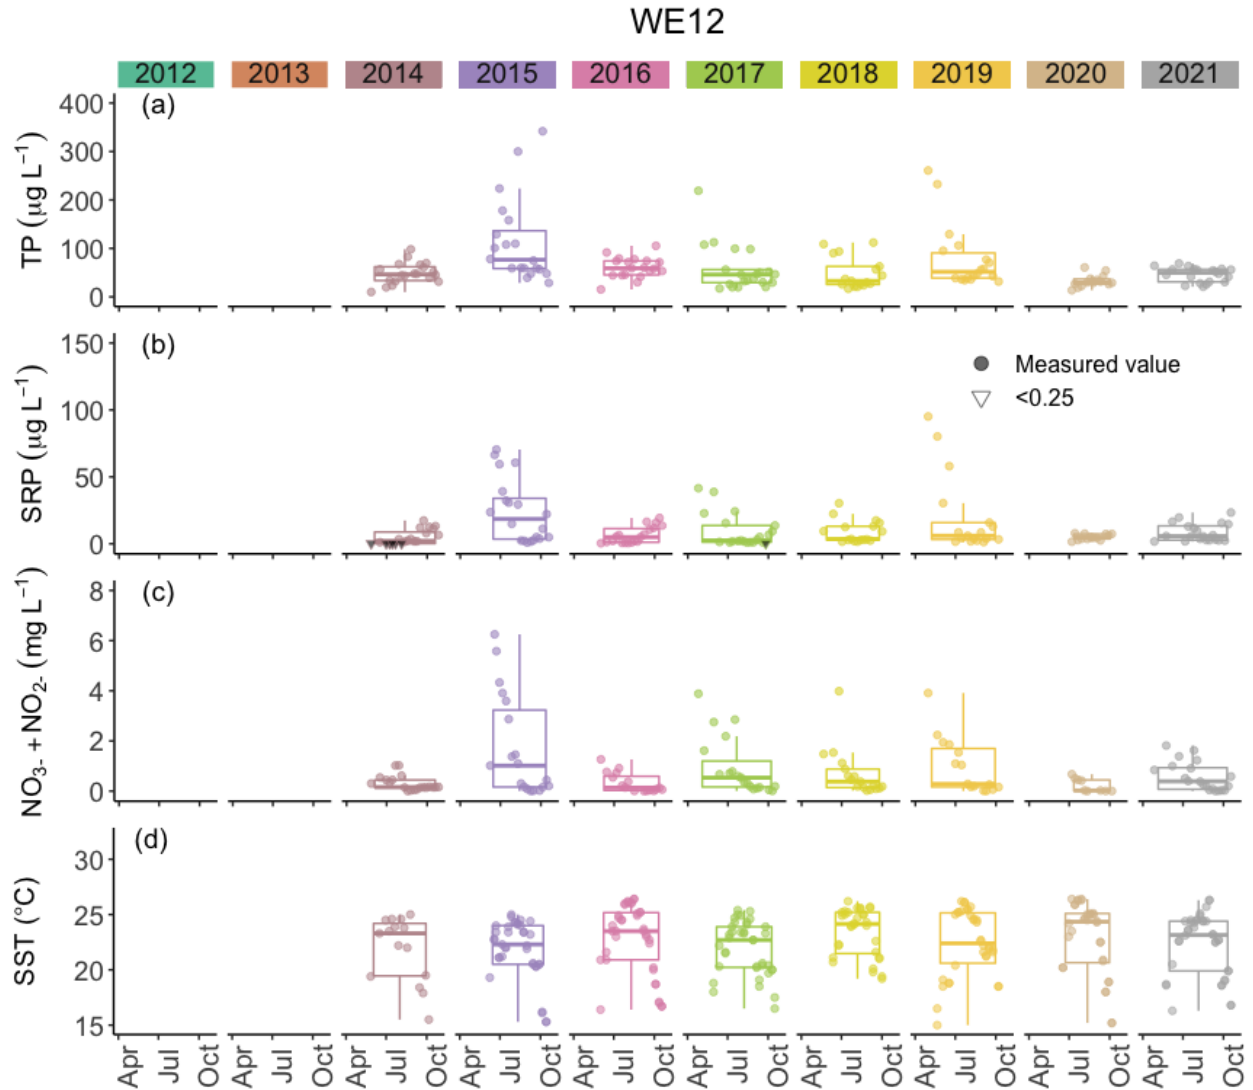

Figure S12. Concentrations of total phosphorus (TP), soluble reactive phosphorus (SRP), nitrate plus nitrite ( $\text{NO}_3^- + \text{NO}_2^-$ ), and sea surface temperature (SST) at Station WE12 for all years sampled. Boxplots represent the median and 25% and 75% quartiles with whiskers extending to the highest or lowest point within 1.5x the interquartile range. A scatterplot is overlaid on the boxplots.

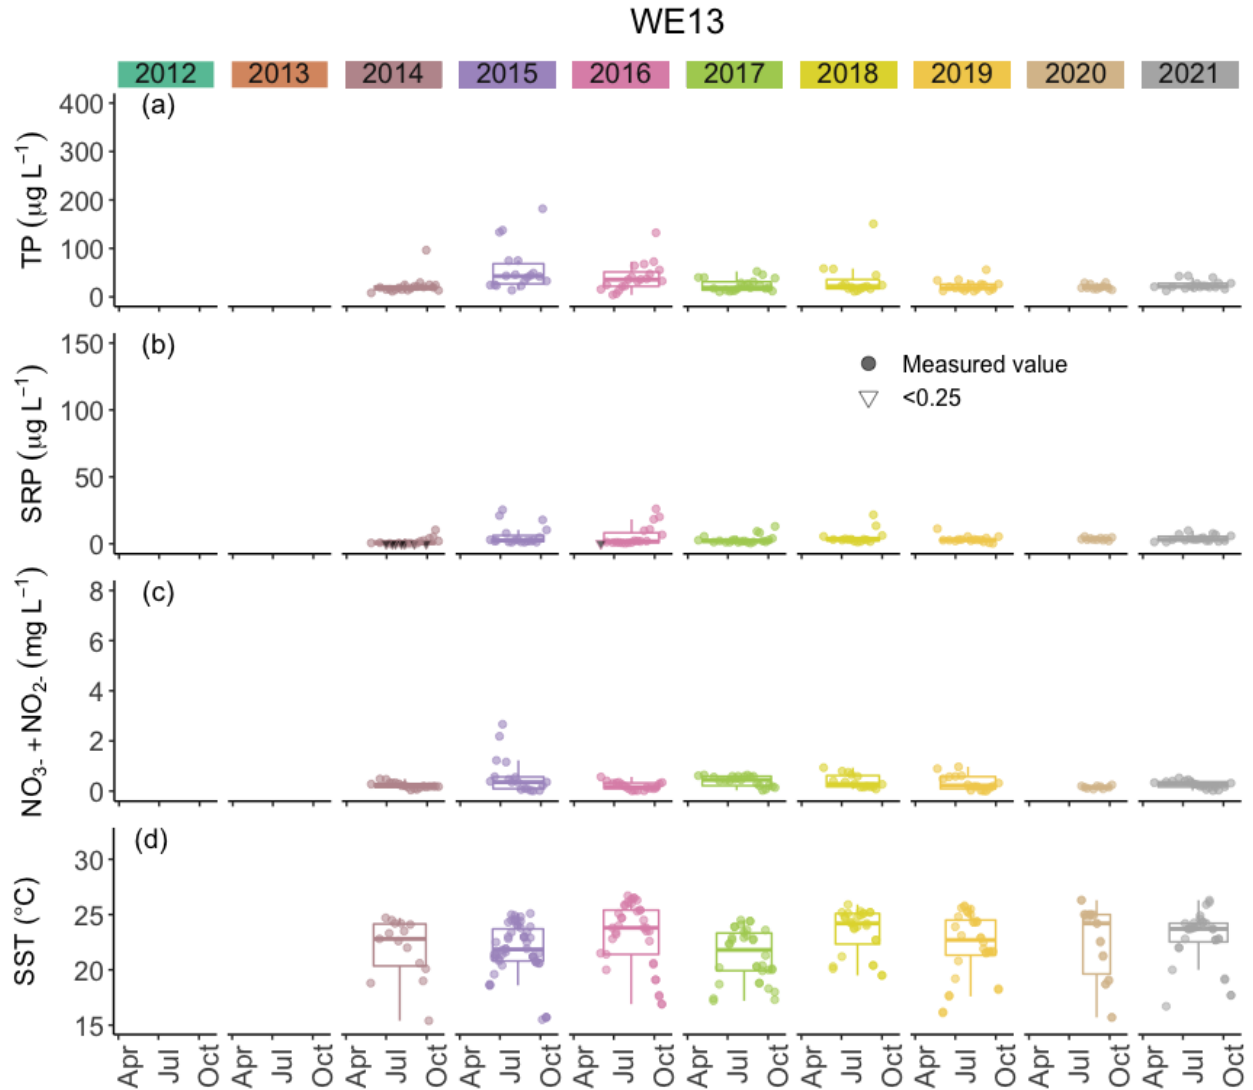

Figure S13. Concentrations of total phosphorus (TP), soluble reactive phosphorus (SRP), nitrate plus nitrite ( $\text{NO}_3^- + \text{NO}_2^-$ ), and sea surface temperature (SST) at Station WE13 for all years sampled. Boxplots represent the median and 25% and 75% quartiles with whiskers extending to the highest or lowest point within 1.5x the interquartile range. A scatterplot is overlaid on the boxplots.

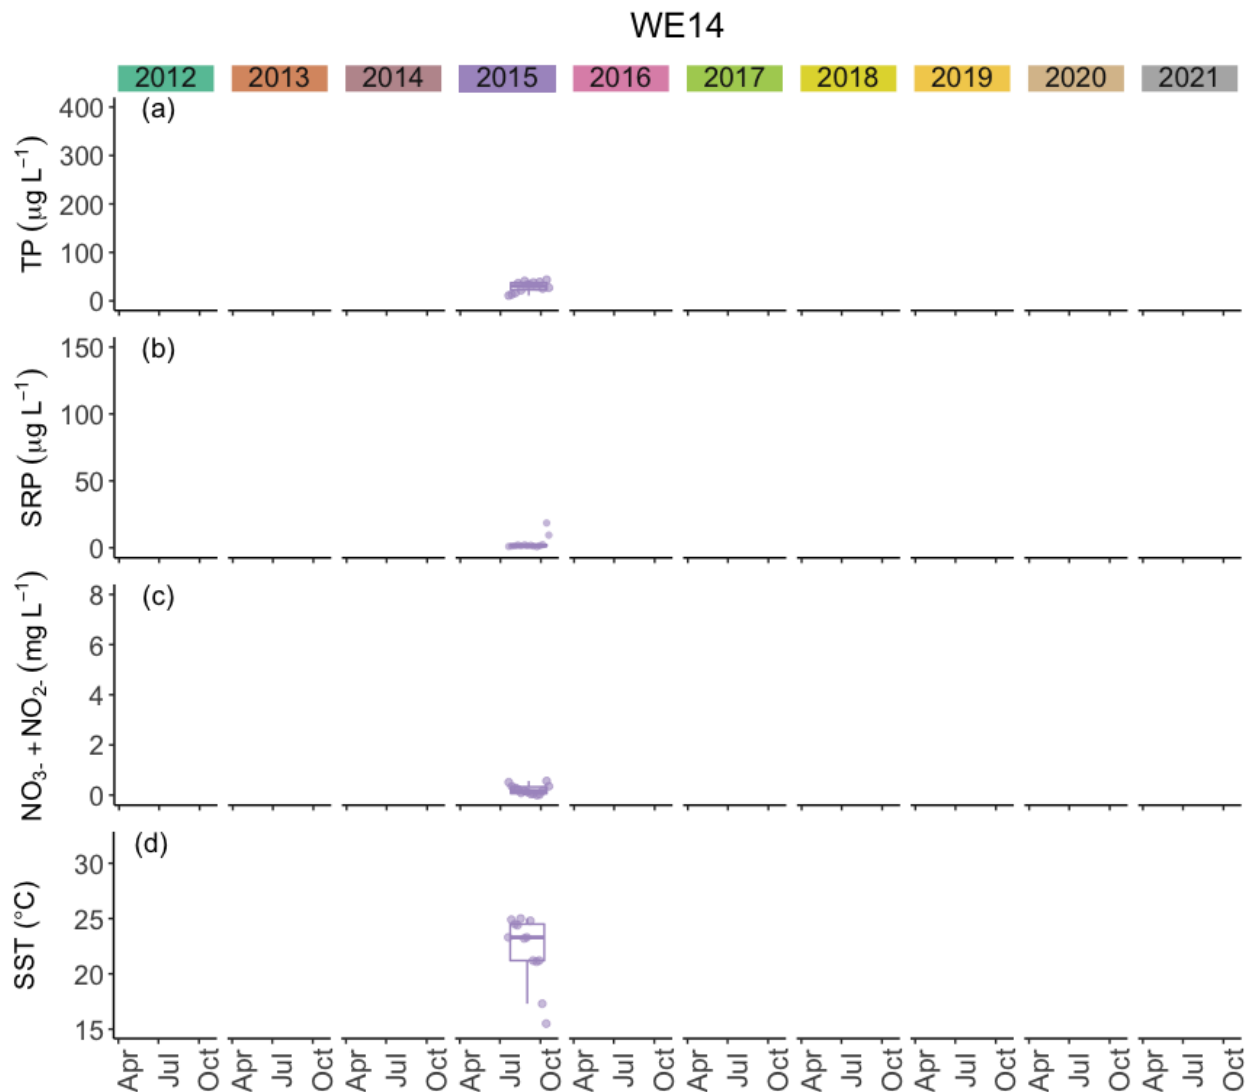

Figure S14. Concentrations of total phosphorus (TP), soluble reactive phosphorus (SRP), nitrate plus nitrite ( $\text{NO}_3^- + \text{NO}_2^-$ ), and sea surface temperature (SST) at Station WE14 for all years sampled. Boxplots represent the median and 25% and 75% quartiles with whiskers extending to the highest or lowest point within 1.5x the interquartile range. A scatterplot is overlaid on the boxplots.

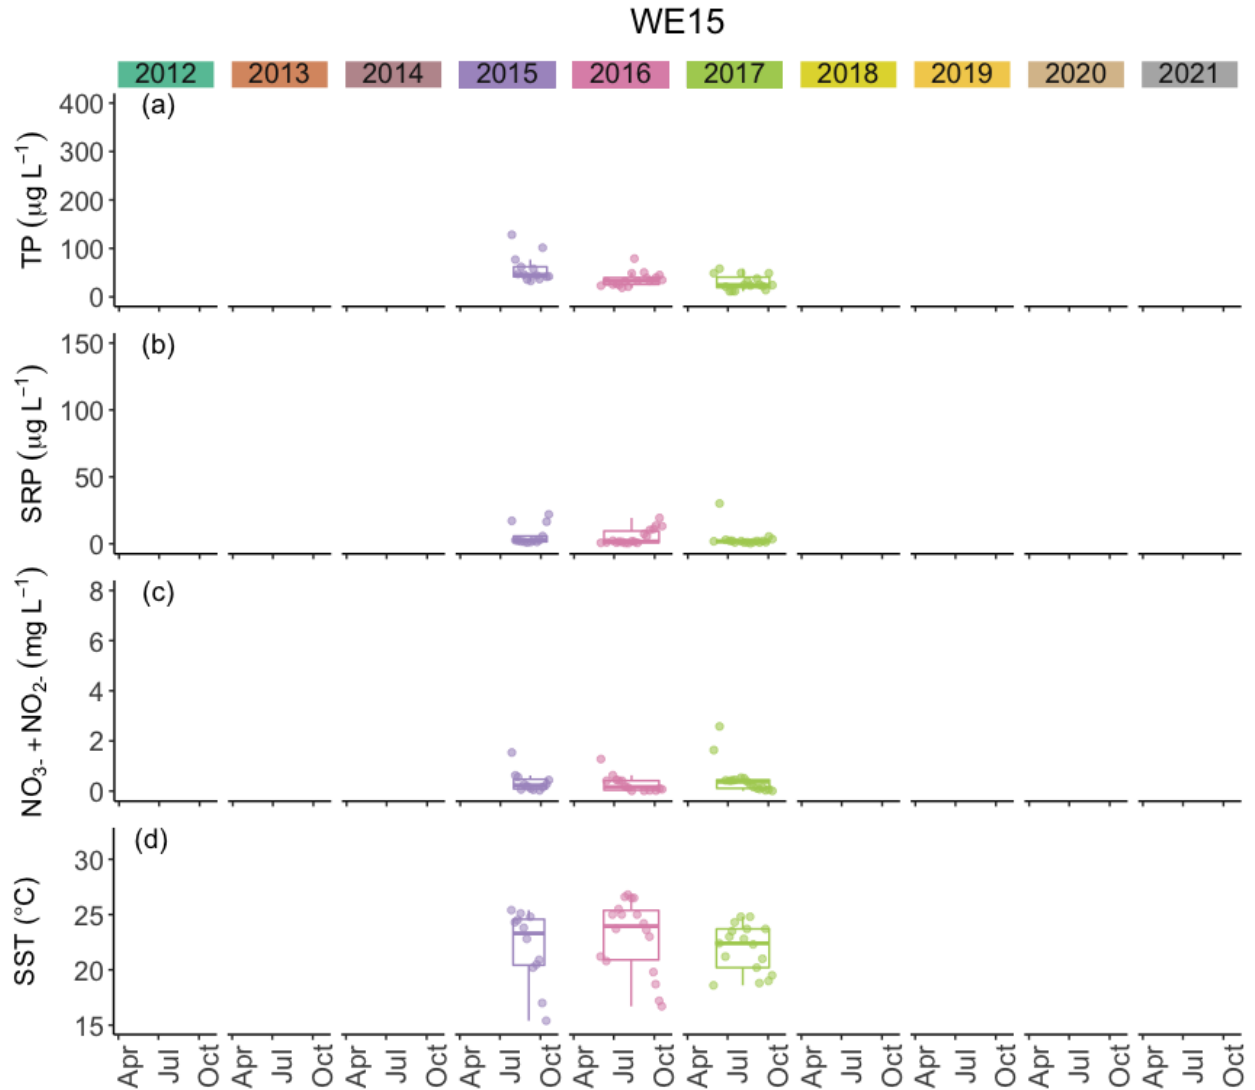

Figure S15. Concentrations of total phosphorus (TP), soluble reactive phosphorus (SRP), nitrate plus nitrite ( $\text{NO}_3^- + \text{NO}_2^-$ ), and sea surface temperature (SST) at Station WE15 for all years sampled. Boxplots represent the median and 25% and 75% quartiles with whiskers extending to the highest or lowest point within 1.5x the interquartile range. A scatterplot is overlaid on the boxplots.



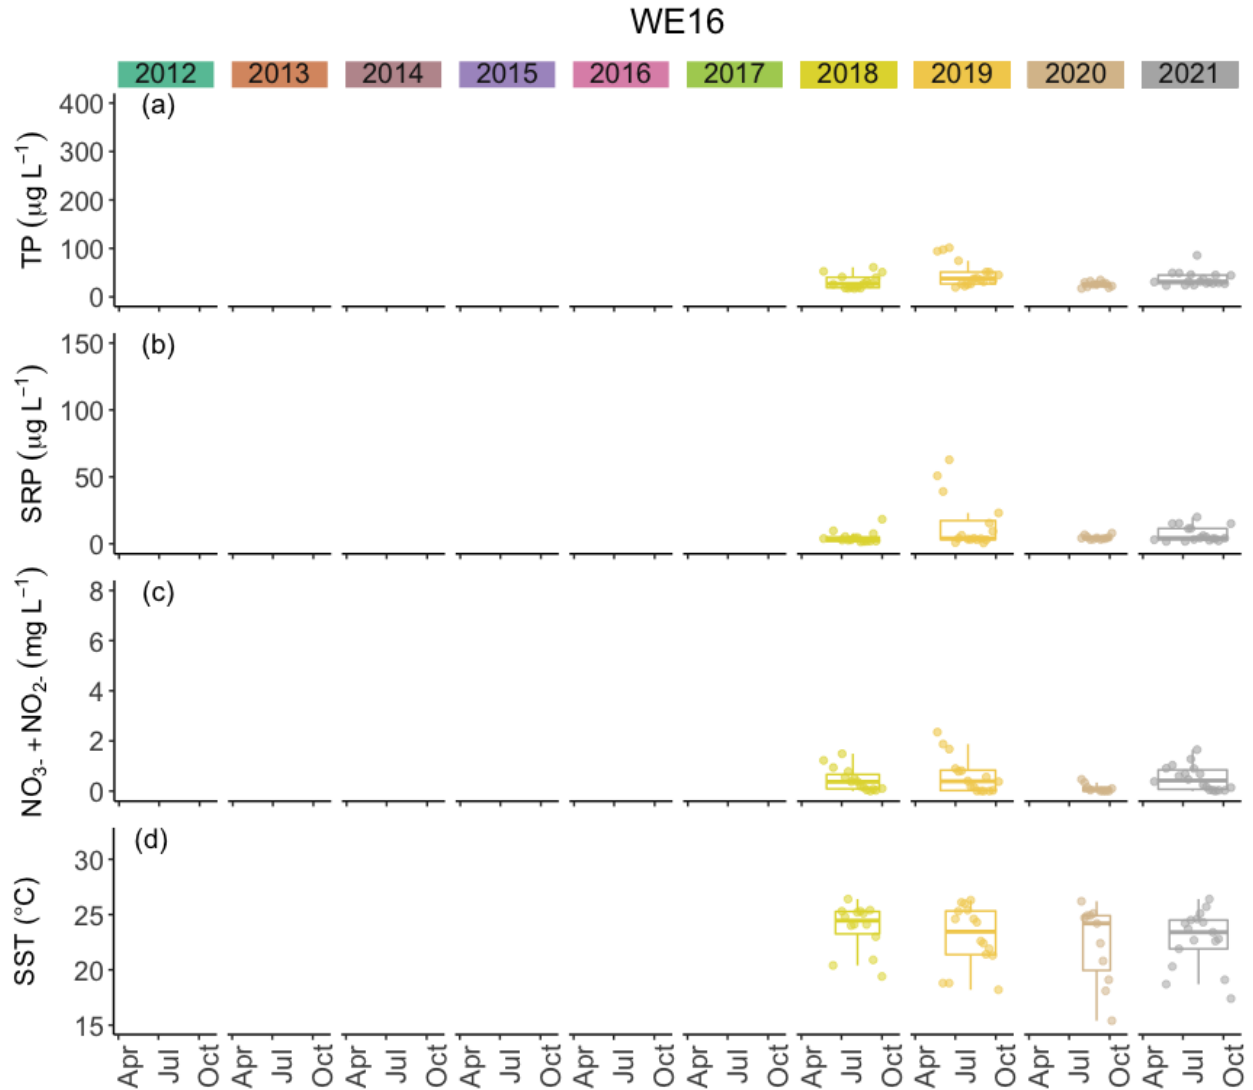

Figure S16. Concentrations of total phosphorus (TP), soluble reactive phosphorus (SRP), nitrate plus nitrite ( $\text{NO}_3^- + \text{NO}_2^-$ ), and sea surface temperature (SST) at Station WE16 for all years sampled. Boxplots represent the median and 25% and 75% quartiles with whiskers extending to the highest or lowest point within 1.5x the interquartile range. A scatterplot is overlaid on the boxplots.
